# Supplementary material for: Fibrous capsule-resistant, controllably degradable and functionalizable zwitterion-albumin hybrid hydrogels
Source: Royal Society of Chemistry journal article supplement (doi:10.1039/d3bm01783d), 2023-11-29
Supplement: d3bm01783d1.pdf [file d3bm01783d1.pdf]

## Supporting Information

### **Fibrous Capsule-resistant, Controllable Degradable and Functionalizable Zwitterion-albumin Hybrid Hydrogels**

*Zuolong Liu, †<sup>a</sup> Xianchi Zhou, †<sup>a</sup> Yongcheng Chen,<sup>a</sup> Yanwen Ni,<sup>a</sup> Zihao Zhu,<sup>a</sup> Wenzhong Cao,<sup>a</sup> Kexin Chen,<sup>a</sup> Yu Yan,<sup>a</sup> Jian Ji<sup>a,b</sup> and Peng Zhang<sup>\*a,b</sup>*

*<sup>a</sup>MOE Key Laboratory of Macromolecule Synthesis and Functionalization of Ministry of Education,  
Department of Polymer Science and Engineering, Zhejiang University, Hangzhou, P. R. China*

*<sup>b</sup>International Research Center for X Polymers, International Campus, Zhejiang University,  
Haining, P. R. China*

*†Equal contribution*

*\*To whom correspondence should be addressed: zhangp7@zju.edu.cn*

### **TNBS reaction and amino determination**

Unless otherwise stated, the TNBS reaction was carried out as follows: 0.25 mL of a sample, containing between  $0.25 \times 10^{-3}$  and  $2.5 \times 10^{-3}$  amino equiv/L, is mixed in a test tube with 2.00 mL of phosphate buffer at pH 8.2. 2 mL of 0.1% TNBS solution is added and placed in a water bath at 50°C for 1 hour in a dark environment. After incubation, 4 mL of 0.1 M HCl is added to terminate the reaction, and the solution is allowed to stand at room temperature for 30 min before the absorbance is read against water at 340 nm. Using L-leucine as the free amino substrate, the standard curve was made according to the above method. At the same time, the number of amino groups on the modified albumin surface was calculated. (Table S2. and Fig. S2)

**Table S1.** Formula of synthetic hydrogel and modification of a protein surface

| <b>Hydrogel</b> | <b>Proportion (final)</b>          | <b>Degree of acrylic modification</b> |
|-----------------|------------------------------------|---------------------------------------|
| <b>PCB-H20</b>  | 20% CBAA, 2% H20;(w/v)             | 80.8%                                 |
| <b>PCB-H10</b>  | 20% CBAA, 2% H10;(w/v)             | 57.8%                                 |
| <b>PCB-H5</b>   | 20% CBAA, 2% H5;(w/v)              | 28.9%                                 |
| <b>PCB-H3</b>   | 20% CBAA, 2% H3;(w/v)              | 12.0%                                 |
| <b>PEG</b>      | 7% PEGDA                           | --                                    |
| <b>PCB-PEG</b>  | 20% CBAA, 2% 4arm-PEG-AC           | --                                    |
| <b>PCB-H20S</b> | 20% CBAA, 2% H20;(w/v)<br>2mM TCEP | 80.8%                                 |

**Notes:** all gelatinization processes use 4‰ APS initiator and catalyst TEMED; (w/v)

**Table S2.** Double bond modification scheme of serum albumin calculated by standard curve.

| 200 mg HSA<br>Pure<br>HAS | 200mg HSA<br>3 mg NAS<br>H3 | 200 mg HSA<br>5 mg NAS<br>H5 | 200 mg HSA<br>10 mg NAS<br>H10 | 200 mg HSA<br>20 mg NAS<br>H20 |
|---------------------------|-----------------------------|------------------------------|--------------------------------|--------------------------------|
| 0%                        | 12.0%                       | 28.9%                        | 57.8%                          | 80.8%                          |
| 23                        | 20                          | 16                           | 10                             | 4                              |
| 0                         | 3                           | 7                            | 13                             | 19                             |

**Notes:** the first line represents Proportion of feeding components; The second line represents amino reaction rate on protein surface; The third line represents the number of amino groups remaining on each albumin; The fourth line represents the average number of amino groups that react on each protein. The above data were tested using TNBS reagents by previously methods reported.

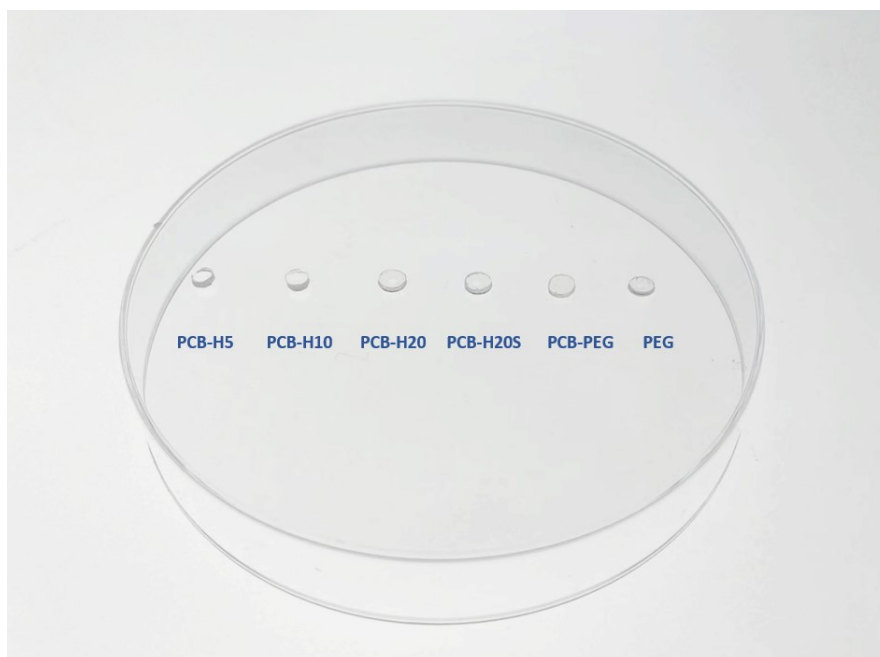

**Fig. S1** Photographs of the hydrogel disc implants. Size: diameter 5 mm, thickness 1 mm.

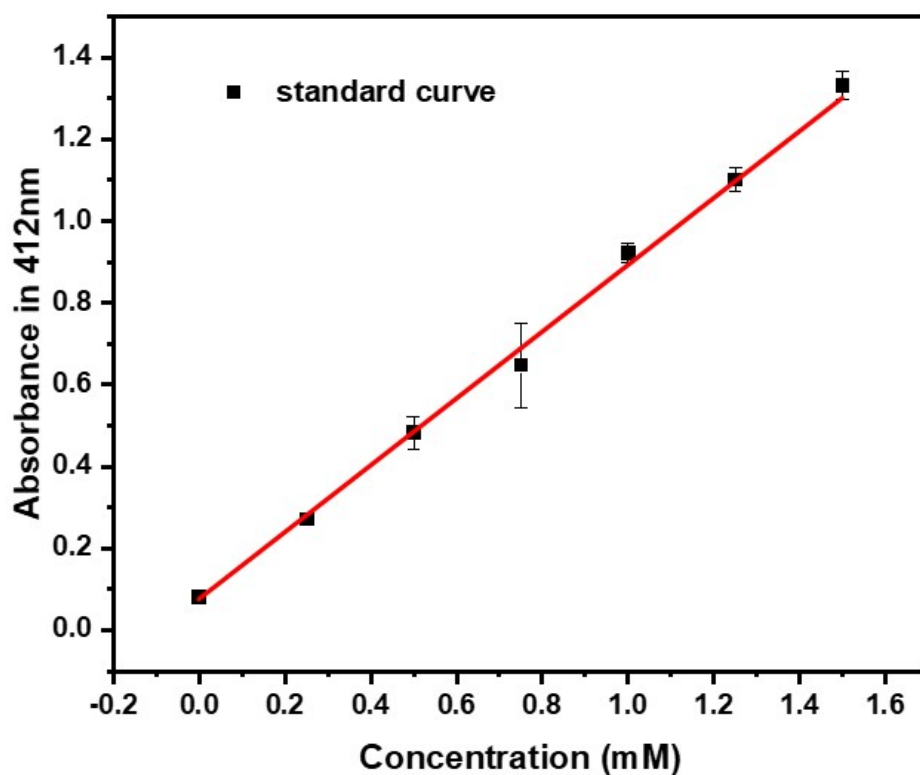

**Fig. S2** Standard curve of amino concentration and absorbance. The absorbance of different concentrations of lysine was tested after incubation with TNBS, and the relationship between amino group and absorbance was characterized, which was used as a reference curve to characterize the degree of protein surface modification.
